# Supplementary material for: Effects of the COVID-19 Pandemic on the Behavioural Tendencies of Cats and Dogs in Japan
Source: MDPI journal article supplement (doi:10.3390/ani13132217), 2023-07-06
Supplement: s1 [file s1]

# Questionnaire 1: For cat owners

## Survey of changes in the relationship between pets and people in the context of social change (cats)

\* Indicates required question

---

1. If you are willing to participate in this survey, please check the "I agree" box and proceed. If you are under 20 years old or do not agree, please close your browser. \*

*Check all that apply.*

☐ I agree

Tell us about yourself

2. Gender \*

*Mark only one oval.*

☐ Female

☐ Male

☐ Other

☐ I don't want to answer

3. Age (Please enter the age in digits only) \*

---

4. Prefecture you live in \*

*Mark only one oval.*

- ☐ Hokkaido
- ☐ Aomori
- ☐ Iwate
- ☐ Miyagi
- ☐ Akita
- ☐ Yamagata
- ☐ Fukushima
- ☐ Ibaraki
- ☐ Tochigi
- ☐ Gunma
- ☐ Saitama
- ☐ Chiba
- ☐ Tokyo
- ☐ Kanagawa
- ☐ Niigata
- ☐ Toyama
- ☐ Ishikawa
- ☐ Fukui
- ☐ Yamanashi
- ☐ Nagano
- ☐ Gifu
- ☐ Shizuoka
- ☐ Aichi
- ☐ Mie
- ☐ Shiga
- ☐ Kyoto
- ☐ Osaka
- ☐ Hyogo
- ☐ Nara
- ☐ Wakayama
- ☐ Tottori
- ☐ Shimane

- ☐ Okayama
- ☐ Hiroshima
- ☐ Yamaguchi
- ☐ Tokushima
- ☐ Kagawa
- ☐ Ehime
- ☐ Kochi
- ☐ Fukuoka
- ☐ Saga
- ☐ Nagasaki
- ☐ Kumamoto
- ☐ Oita
- ☐ Miyazaki
- ☐ Kagoshima
- ☐ Okinawa

5. Job style \*

*Mark only one oval.*

- ☐ Full time job
- ☐ Part time job
- ☐ Student
- ☐ No job

6. Changes in their working/schooling conditions due to the COVID-19 pandemic \*

*Mark only one oval.*

- ☐ stayed at home as before the state of emergency
- ☐ went from commuting to work or school to being home due to the state of emergency
- ☐ commuted to work or school but the number of times decreased due to the state of emergency
- ☐ went to work or school as before the state of emergenc

7. Current commuting status after lifting of emergency declaration \*

*Mark only one oval.*

- ☐ being at home
- ☐ going to work or school as before the state of emergency
- ☐ commuting to work or school, but less often than before the declaration

8. Human family members living with you \*

*Mark only one oval.*

- ☐ No family members living with me      *Skip to question 16*
- ☐ I have family members living with me      *Skip to question 9*

Please tell us about the family members living with you. (First person)

9. Relationship with you (from your point of view)

*Mark only one oval.*

- ☐ Spouse/Partner
- ☐ Parent
- ☐ Child
- ☐ Relatives not listed above
- ☐ Friend
- ☐ Other: \_\_\_\_\_

10. Gender

*Mark only one oval.*

- ☐ Female
- ☐ Male
- ☐ Other
- ☐ I don't want to answer

11. Age (Please enter the age in digits only)

---

12. Job style

*Mark only one oval.*

- ☐ Full time job
- ☐ Part time job
- ☐ No job
- ☐ Students (College student / High school student / Junior high school student / Elementary school student)
- ☐ Kindergarten Child / Nursery Child
- ☐ Infants not attending preschool

13. Changes in their working/schooling conditions due to the COVID-19 pandemic

*Mark only one oval.*

- ☐ stayed at home as before the state of emergency
- ☐ went from commuting to work or school to being home due to the state of emergency
- ☐ commuted to work or school but the number of times decreased due to the state of emergency
- ☐ went to work or school as before the state of emergency

14. Current commuting status after lifting of emergency declaration

*Mark only one oval.*

- ☐ being at home
- ☐ going to work or school as before the state of emergency
- ☐ commuting to work or school, but less often than before the declaration

15. Other family members living with you

*Mark only one oval.*

☐ Not present      *Skip to question 16*

☐ There's more

If there were more than two family members (up to a sixth), respondents answered the same questions above for each family member.

Please tell us about the cat that is the subject of this response

16. Sex \*

*Mark only one oval.*

☐ Male

☐ Female

☐ Unknown

17. Age of the cat (if unknown, leave blank)

---

18. Spaying and neutering \*

*Mark only one oval.*

☐ Done

☐ Not

☐ Unknown

19. Age in months at which breeding started (if unknown, leave blank)

---

20. Origin \*

*Mark only one oval.*

☐ Pet shop

☐ Breeder

☐ Shelter

☐ Unknown

☐ Other: \_\_\_\_\_

21. Breed (e.g., mongrel, American Shorthair; if unknown, leave blank)

\_\_\_\_\_

22. Coat color (e.g., brown tabby and white; if unknown, leave blank)

\_\_\_\_\_

23. Eye color (e.g. green; if unknown, leave blank)

\_\_\_\_\_

24. Hair length \*

*Mark only one oval.*

☐ Short

☐ Long

☐ Unknown

☐ Other: \_\_\_\_\_

25. Approximate weight (if unknown, leave blank)

\_\_\_\_\_

26. If you have other cats, how many?

---

27. Please tell us if you have any other animals living with you in addition to the cat.  
(e.g., one dog)

---

Please answer the following questions about yourself





Please answer the following questions about your daily physical activity. Intense physical activity means any activity that feels physically demanding and causes you to breathe very unevenly. Moderate physical activity is defined as activity that is somewhat physically demanding and makes you a little out of breath. For the following questions, please consider only physical activity that lasts at least 10 minutes at a time.

29. In an average week, how many days do you engage in strong physical activity (carrying heavy loads, biking up hills, jogging, playing single tennis, etc.)?

*Mark only one oval.*

☐ 1

☐ 2

☐ 3

☐ 4

☐ 5

☐ 6

☐ 7

☐ 0

30. On days when you engage in strong physical activity, for how long do you typically engage in such activities in total per day? (approximate hours)

---

31. In an average week, how many days do you engage in moderate physical activity (carrying light loads, playing tags with children, slow swimming, tennis doubles, golf without a cart, etc.)? Please do not include walking or strolling in this list.

*Mark only one oval.*

- ☐ 1
- ☐ 2
- ☐ 3
- ☐ 4
- ☐ 5
- ☐ 6
- ☐ 7
- ☐ 0

32. On days when you engage in moderate physical activity, how long do you typically engage in such activity in total per day? (approximate hours)

---

33. In an average week, how many days do you engage in moderate physical activity (carrying light loads, playing tags with children, slow swimming, tennis doubles, golf without a cart, etc.)? Please do not include walking or strolling in this list.

*Mark only one oval.*

- ☐ 1
- ☐ 2
- ☐ 3
- ☐ 4
- ☐ 5
- ☐ 6
- ☐ 7
- ☐ 0

34. On such days, how long do you typically walk in total per day?

---

35. At what speed do you walk normally?

*Mark only one oval.*

- ☐ Quite fast, like breathing very unevenly
- ☐ A little breathless speed
- ☐ Slow and easy speed

36. This refers to the time you spend sitting or lying down every day (at work, studying, leisure time, etc.). Include all time spent at a desk, chatting with friends, reading, sitting, lying down, watching TV, etc. Do not include sleep time. On weekdays, how much time do you spend sitting or lying down in total per day?

---

37. During the holidays, how much time do you typically spend sitting or lying down in total per day?

---

For the following exercise questions, please select "yes" if applicable or "no" if not applicable.

38. Can climb up and down stairs

*Mark only one oval.*

- ☐ Yes
- ☐ No

39. No shortness of breath when climbing stairs

*Mark only one oval.*

☐ Yes

☐ No

40. Can jump up on both feet at the same time

*Mark only one oval.*

☐ Yes

☐ No

41. Can run about 20 steps

*Mark only one oval.*

☐ Yes

☐ No

42. Can overtake someone walking in front of you.

*Mark only one oval.*

☐ Yes

☐ No

43. Can walk for more than 30 min

*Mark only one oval.*

☐ Yes

☐ No

44. Can carry about objects weighing 5 kg

*Mark only one oval.*

☐ Yes

☐ No

45. Can lift objects weighing about 10 kg

*Mark only one oval.*

☐ Yes

☐ No

46. Can wake up a fallen bicycle

*Mark only one oval.*

☐ Yes

☐ No

47. Can open caps on plastic bottles

*Mark only one oval.*

☐ Yes

☐ No

48. Can touch the floor with fingertips while knees are extended

*Mark only one oval.*

☐ Yes

☐ No

49. Can put on socks, pants, skirts, etc. while standing without support

*Mark only one oval.*

☐ Yes

☐ No

50. Can get up from a chair without using hands

*Mark only one oval.*

☐ Yes

☐ No

51. Can stand on tiptoe without support

*Mark only one oval.*

☐ Yes

☐ No

Please indicate any changes in your involvement with the cat under the emergency declaration compared to before the COVID-19 outbreak led to calls for restraint in behavior.

52. Frequency of approaching the cat by themselves \*

*Mark only one oval.*

☐ Increased

☐ Unchanged

☐ Decreased

53. Frequency of petting/touching the cat by themselves \*

*Mark only one oval.*

- ☐ Increased
- ☐ Unchanged
- ☐ Decreased

54. Frequency of calling to the cat \*

*Mark only one oval.*

- ☐ Increased
- ☐ Unchanged
- ☐ Decreased

55. Frequency of feeding (food) the cat \*

*Mark only one oval.*

- ☐ Increased
- ☐ Unchanged
- ☐ Decreased

56. Frequency of giving treats to the cat \*

*Mark only one oval.*

- ☐ Increased
- ☐ Unchanged
- ☐ Decreased

Please tell us about the behavior and condition of the cat that is the subject of this response.



The questions are divided into sections using simple language to help you identify feline behavior. Please answer all questions by selecting the appropriate option for each situation: what it looked like before the COVID-19 outbreak led to calls for behavioral restraint (before COVID-19), and what it looked like when it was restrained under the emergency declaration (after COVID-19). If you cannot answer a question (for example, you have never seen the cat in the situation described, it does not apply to my cat, etc.), please select "I have never encountered this situation" on the far right. The Feline Behavioral Assessment & Research Questionnaire (Fe-BARQ) © James Serpell 2014

Please tell us about your family situation

57. What is the layout of your house? \*

*Mark only one oval.*

- ☐ 1R, 1K
- ☐ 2K, 2DK, 2LDK
- ☐ 3K, 3DK, 3LDK
- ☐ 4K, 4DK, 4LDK
- ☐ 5K, 5DK, 5LDK or more
- ☐ Don't know, don't want to answer

58. What is your annual household income (including taxes)? \*

*Mark only one oval.*

- ☐ No income
- ☐ ~ less than 2 million yen
- ☐ 2-4 million yen
- ☐ 4-6 million yen
- ☐ 6-8 million yen
- ☐ 8-10 million yen
- ☐ 10-12 million yen
- ☐ 12-15 million yen
- ☐ 15-20 million yen
- ☐ 20 million yen or more
- ☐ Don't know, don't want to answer

59. What was the last school from which you graduated?

*Mark only one oval.*

- ☐ Junior high school
- ☐ High school
- ☐ Vocational school
- ☐ College of technology
- ☐ Junior college
- ☐ Four-year university
- ☐ Graduate school (including 6-year univ)
- ☐ Other

60. If you answered "other" above, please specify

---

61. A second survey will be scheduled after self-restraint and other conditions have completely improved. If you are willing to cooperate, please enter any 8-digit number (half-width characters) below and enter the same number for the second survey.

---

62. Please feel free to add any comments or suggestions you may have below. This is the last question. Thank you very much for your cooperation in this long survey!

---

---

---

---

---

---

This content is neither created nor endorsed by Google.

Google Forms

## Questionnaire 2: For dog owners

# Survey of changes in the relationship between pets and people in the context of social change (dogs)

\* Indicates required question

---

1. If you are willing to participate in this survey, please check the "I agree" box and proceed. If you are under 20 years old or do not agree, please close your browser. \*

*Check all that apply.*

☐ I agree

Tell us about yourself

2. Gender \*

*Mark only one oval.*

☐ Female

☐ Male

☐ Other

☐ I don't want to answer

3. Age (Please enter the age in digits only) \*

---

4. Prefecture you live in \*

*Mark only one oval.*

- ☐ Hokkaido
- ☐ Aomori
- ☐ Iwate
- ☐ Miyagi
- ☐ Akita
- ☐ Yamagata
- ☐ Fukushima
- ☐ Ibaraki
- ☐ Tochigi
- ☐ Gunma
- ☐ Saitama
- ☐ Chiba
- ☐ Tokyo
- ☐ Kanagawa
- ☐ Niigata
- ☐ Toyama
- ☐ Ishikawa
- ☐ Fukui
- ☐ Yamanashi
- ☐ Nagano
- ☐ Gifu
- ☐ Shizuoka
- ☐ Aichi
- ☐ Mie
- ☐ Shiga
- ☐ Kyoto
- ☐ Osaka
- ☐ Hyogo
- ☐ Nara
- ☐ Wakayama
- ☐ Tottori
- ☐ Shimane

- ☐ Okayama
- ☐ Hiroshima
- ☐ Yamaguchi
- ☐ Tokushima
- ☐ Kagawa
- ☐ Ehime
- ☐ Kochi
- ☐ Fukuoka
- ☐ Saga
- ☐ Nagasaki
- ☐ Kumamoto
- ☐ Oita
- ☐ Miyazaki
- ☐ Kagoshima
- ☐ Okinawa

5. Job style \*

*Mark only one oval.*

- ☐ Full time job
- ☐ Part time job
- ☐ Student
- ☐ No job

6. Changes in their working/schooling conditions due to the COVID-19 pandemic \*

*Mark only one oval.*

- ☐ stayed at home as before the state of emergency
- ☐ went from commuting to work or school to being home due to the state of emergency
- ☐ commuted to work or school but the number of times decreased due to the state of emergency
- ☐ went to work or school as before the state of emergenc

7. Current commuting status after lifting of emergency declaration \*

*Mark only one oval.*

- ☐ being at home
- ☐ going to work or school as before the state of emergency
- ☐ commuting to work or school, but less often than before the declaration

8. Human family members living with you \*

*Mark only one oval.*

- ☐ No family members living with me      *Skip to question 16*
- ☐ I have family members living with me      *Skip to question 9*

Please tell us about the family members living with you. (First person)

9. Relationship with you (from your point of view)

*Mark only one oval.*

- ☐ Spouse/Partner
- ☐ Parent
- ☐ Child
- ☐ Relatives not listed above
- ☐ Friend
- ☐ Other: \_\_\_\_\_

10. Gender

*Mark only one oval.*

- ☐ Female
- ☐ Male
- ☐ Other
- ☐ I don't want to answer

11. Age (Please enter the age in digits only)

---

12. Job style

*Mark only one oval.*

- ☐ Full time job
- ☐ Part time job
- ☐ No job
- ☐ Students (College student / High school student / Junior high school student / Elementary school student)
- ☐ Kindergarten Child / Nursery Child
- ☐ Infants not attending preschool

13. Changes in their working/schooling conditions due to the COVID-19 pandemic

*Mark only one oval.*

- ☐ stayed at home as before the state of emergency
- ☐ went from commuting to work or school to being home due to the state of emergency
- ☐ commuted to work or school but the number of times decreased due to the state of emergency
- ☐ went to work or school as before the state of emergency

14. Current commuting status after lifting of emergency declaration

*Mark only one oval.*

- ☐ being at home
- ☐ going to work or school as before the state of emergency
- ☐ commuting to work or school, but less often than before the declaration



15. Other family members living with you

*Mark only one oval.*

☐ Not present      *Skip to question 16*

☐ There's more

If there were more than two family members (up to a sixth), respondents answered the same questions above for each family member.

Please tell us about the dog that is the subject of this response

16. Sex \*

*Mark only one oval.*

☐ Male

☐ Female

☐ Unknown

17. Age of the dog (if unknown, leave blank)

---

18. Spaying and neutering \*

*Mark only one oval.*

☐ Done

☐ Not

☐ Unknown

19. Age in months at which breeding started (if unknown, leave blank)

---

20. Origin \*

*Mark only one oval.*

- ☐ Pet shop
- ☐ Breeder
- ☐ Shelter
- ☐ Unknown
- ☐ Other: \_\_\_\_\_

21. Breed (e.g. Golden Retriever. If it is a mix of two breeds, please write  $\triangle\triangle\triangle\times\bigcirc$ . If you have more than three breeds or an unknown mix breed (hybrid), please write "MIX". If unknown, leave blank)

\_\_\_\_\_

22. Approximate weight (if unknown, leave blank)

\_\_\_\_\_

23. If you have other dogs, how many?

\_\_\_\_\_

24. Please tell us if you have any other animals living with you in addition to the dog. (e.g., one cat)

\_\_\_\_\_

Please answer the following questions about yourself



Please answer the following questions about your daily physical activity. Intense physical activity means any activity that feels physically demanding and causes you to breathe very unevenly. Moderate physical activity is defined as activity that is somewhat physically demanding and makes you a little out of breath. For the following questions, please consider only physical activity that lasts at least 10 minutes at a time.

26. In an average week, how many days do you engage in strong physical activity (carrying heavy loads, biking up hills, jogging, playing single tennis, etc.)?

*Mark only one oval.*

☐ 1

☐ 2

☐ 3

☐ 4

☐ 5

☐ 6

☐ 7

☐ 0

27. On days when you engage in strong physical activity, for how long do you typically engage in such activities in total per day? (approximate hours)

---

28. In an average week, how many days do you engage in moderate physical activity (carrying light loads, playing tags with children, slow swimming, tennis doubles, golf without a cart, etc.)? Please do not include walking or strolling in this list.

*Mark only one oval.*

- ☐ 1
- ☐ 2
- ☐ 3
- ☐ 4
- ☐ 5
- ☐ 6
- ☐ 7
- ☐ 0

29. On days when you engage in moderate physical activity, how long do you typically engage in such activity in total per day? (approximate hours)

---

30. In an average week, how many days do you engage in moderate physical activity (carrying light loads, playing tags with children, slow swimming, tennis doubles, golf without a cart, etc.)? Please do not include walking or strolling in this list.

*Mark only one oval.*

- ☐ 1
- ☐ 2
- ☐ 3
- ☐ 4
- ☐ 5
- ☐ 6
- ☐ 7
- ☐ 0

31. On such days, how long do you typically walk in total per day?

---

32. At what speed do you walk normally?

*Mark only one oval.*

☐ Quite fast, like breathing very unevenly

☐ A little breathless speed

☐ Slow and easy speed

33. This refers to the time you spend sitting or lying down every day (at work, studying, leisure time, etc.). Include all time spent at a desk, chatting with friends, reading, sitting, lying down, watching TV, etc. Do not include sleep time. On weekdays, how much time do you spend sitting or lying down in total per day?

---

34. During the holidays, how much time do you typically spend sitting or lying down in total per day?

---

For the following exercise questions, please select "yes" if applicable or "no" if not applicable.

35. Can climb up and down stairs

*Mark only one oval.*

☐ Yes

☐ No

36. No shortness of breath when climbing stairs

*Mark only one oval.*

☐ Yes

☐ No

37. Can jump up on both feet at the same time

*Mark only one oval.*

☐ Yes

☐ No

38. Can run about 20 steps

*Mark only one oval.*

☐ Yes

☐ No

39. Can overtake someone walking in front of you.

*Mark only one oval.*

☐ Yes

☐ No

40. Can walk for more than 30 min

*Mark only one oval.*

☐ Yes

☐ No

41. Can carry objects weighing about 5 kg

*Mark only one oval.*

☐ Yes

☐ No

42. Can lift objects weighing about 10 kg

*Mark only one oval.*

☐ Yes

☐ No

43. Can wake up a fallen bicycle

*Mark only one oval.*

☐ Yes

☐ No

44. Can open caps on plastic bottles

*Mark only one oval.*

☐ Yes

☐ No

45. Can touch the floor with fingertips while knees are extended

*Mark only one oval.*

☐ Yes

☐ No



46. Can put on socks, pants, skirts, etc. while standing without support

*Mark only one oval.*

☐ Yes

☐ No

47. Can get up from a chair without using hands

*Mark only one oval.*

☐ Yes

☐ No

48. Can stand on tiptoe without support

*Mark only one oval.*

☐ Yes

☐ No

Please indicate any changes in your involvement with the dog under the emergency declaration compared to before the COVID-19 outbreak led to calls for restraint in behavior.

49. Frequency of approaching the dog by themselves \*

*Mark only one oval.*

☐ Increased

☐ Unchanged

☐ Decreased

50. Frequency of petting/touching the dog by themselves \*

*Mark only one oval.*

- ☐ Increased
- ☐ Unchanged
- ☐ Decreased

51. Frequency of calling to the dog \*

*Mark only one oval.*

- ☐ Increased
- ☐ Unchanged
- ☐ Decreased

52. Frequency of feeding (food) the dog \*

*Mark only one oval.*

- ☐ Increased
- ☐ Unchanged
- ☐ Decreased

53. Frequency of giving treats to the dog \*

*Mark only one oval.*

- ☐ Increased
- ☐ Unchanged
- ☐ Decreased

54. Please choose how often you walk your canine from the list below. (There are seven options. Please slide right to confirm.) \*

*Mark only one oval per row.*

|                                 | Twice<br>a day        | Once a<br>day         | 2-4<br>times<br>a week | Once a<br>week        | 2 to 3<br>times<br>a<br>month | Almost<br>never       | Other                 |
|---------------------------------|-----------------------|-----------------------|------------------------|-----------------------|-------------------------------|-----------------------|-----------------------|
| <b>Before<br/>COVID-<br/>19</b> | <input type="radio"/> | <input type="radio"/> | <input type="radio"/>  | <input type="radio"/> | <input type="radio"/>         | <input type="radio"/> | <input type="radio"/> |
| <b>After<br/>COVID-<br/>19</b>  | <input type="radio"/> | <input type="radio"/> | <input type="radio"/>  | <input type="radio"/> | <input type="radio"/>         | <input type="radio"/> | <input type="radio"/> |

55. Please select the length of your usual one walk \*

*Mark only one oval per row.*

|                                 | More<br>than 1<br>hour | More<br>than 30<br>minutes<br>but less<br>than 1<br>hour | More<br>than 15<br>minutes<br>but less<br>than 30<br>minutes | Less<br>than 15<br>minutes |
|---------------------------------|------------------------|----------------------------------------------------------|--------------------------------------------------------------|----------------------------|
| <b>Before<br/>COVID-<br/>19</b> | <input type="radio"/>  | <input type="radio"/>                                    | <input type="radio"/>                                        | <input type="radio"/>      |
| <b>After<br/>COVID-<br/>19</b>  | <input type="radio"/>  | <input type="radio"/>                                    | <input type="radio"/>                                        | <input type="radio"/>      |

Please tell us about the behavior and condition of the dog that is the subject of this response.

The questions are divided into sections using simple language to help you identify canine behavior. Please answer all questions by selecting the appropriate option for each situation: what it looked like before the COVID-19 outbreak led to calls for behavioral restraint (before COVID-19), and what it looked like when it was restrained under the emergency declaration (after COVID-19). If you cannot answer a question (for example, you have never seen the dog in the situation described, it does not apply to my dog, etc.), please select "I have never encountered this situation" on the far right.

The Canine Behavioral Assessment & Research Questionnaire (C-BARQ) ©James Serpell2005

### Rearing situation

For each of the following questions, please select the number that applies to you before and after COVID-19.

#### 56. Rearing Locations \*

*Mark only one oval per row.*

|                                 | 1.<br>Indoor          | 2.<br>Outdoor         | 3. Both<br>indoor<br>and<br>outdoor |
|---------------------------------|-----------------------|-----------------------|-------------------------------------|
| <b>Before<br/>COVID-<br/>19</b> | <input type="radio"/> | <input type="radio"/> | <input type="radio"/>               |
| <b>After<br/>COVID-<br/>19</b>  | <input type="radio"/> | <input type="radio"/> | <input type="radio"/>               |

57. Time spent in the same room as the dog per day. \*

Mark only one oval per row.

|                                 | 1.<br>Less<br>than 1<br>hour | 2.<br>More<br>than 1<br>hour<br>but<br>less<br>than 6<br>hours | 3.<br>More<br>than 6<br>hours<br>but<br>less<br>than<br>12<br>hours | 4.<br>More<br>than<br>12<br>hours |
|---------------------------------|------------------------------|----------------------------------------------------------------|---------------------------------------------------------------------|-----------------------------------|
| <b>Before<br/>COVID-<br/>19</b> | <input type="radio"/>        | <input type="radio"/>                                          | <input type="radio"/>                                               | <input type="radio"/>             |
| <b>After<br/>COVID-<br/>19</b>  | <input type="radio"/>        | <input type="radio"/>                                          | <input type="radio"/>                                               | <input type="radio"/>             |

58. State in which the dog spends time when the owner is home \*

Mark only one oval per row.

|                                 | 1. Free<br>to<br>move | 2. In a<br>circle     | 3. Tie<br>to a<br>string |
|---------------------------------|-----------------------|-----------------------|--------------------------|
| <b>Before<br/>COVID-<br/>19</b> | <input type="radio"/> | <input type="radio"/> | <input type="radio"/>    |
| <b>After<br/>COVID-<br/>19</b>  | <input type="radio"/> | <input type="radio"/> | <input type="radio"/>    |

59. State in which the dog spends time when the owner is away \*

Mark only one oval per row.

|                                 | 1. Free<br>to<br>move | 2. In a<br>circle     | 3.<br>Crate<br>(with<br>door<br>closed) | 4. Tie<br>to a<br>string |
|---------------------------------|-----------------------|-----------------------|-----------------------------------------|--------------------------|
| <b>Before<br/>COVID-<br/>19</b> | <input type="radio"/> | <input type="radio"/> | <input type="radio"/>                   | <input type="radio"/>    |
| <b>After<br/>COVID-<br/>19</b>  | <input type="radio"/> | <input type="radio"/> | <input type="radio"/>                   | <input type="radio"/>    |

60. Whether the dog is allowed to accompany the owner when the owner is away \*  
from home (e.g., at work) and how the dog spends time there.

Mark only one oval per row.

|                                 | 1.<br>Accompany<br>and free<br>there | 2.<br>Accompany,<br>but tied up<br>or in a cage<br>there | 3. Not<br>accompany   | 4.<br>Other           |
|---------------------------------|--------------------------------------|----------------------------------------------------------|-----------------------|-----------------------|
| <b>Before<br/>COVID-<br/>19</b> | <input type="radio"/>                | <input type="radio"/>                                    | <input type="radio"/> | <input type="radio"/> |
| <b>After<br/>COVID-<br/>19</b>  | <input type="radio"/>                | <input type="radio"/>                                    | <input type="radio"/> | <input type="radio"/> |

61. Sleeping place at night (There are five options. Please slide right to confirm.) \*

Mark only one oval per row.

|                        | 1. In a circle        | 2. They're on a string. | 3. Inside the crate (with the door closed) | 4. Sleeps in own bed or crate with freedom to move | 5. In the same bed as the owner |
|------------------------|-----------------------|-------------------------|--------------------------------------------|----------------------------------------------------|---------------------------------|
| <b>Before COVID-19</b> | <input type="radio"/> | <input type="radio"/>   | <input type="radio"/>                      | <input type="radio"/>                              | <input type="radio"/>           |
| <b>After COVID-19</b>  | <input type="radio"/> | <input type="radio"/>   | <input type="radio"/>                      | <input type="radio"/>                              | <input type="radio"/>           |

62. Approximately, how many hours per day do you usually leave your dog at home? Please choose one from the following. If it varies from day to day, please choose the most frequent option from the list below. (There are five options. Please slide right to confirm.) \*

Mark only one oval per row.

|                        | 1. Less than 3 hours  | 2. More than 3 hours but less than 6 hours | 3. More than 6 hours but less than 10 hours | 4. More than 10 hours | 5. Can't choose because of the variation from day to day. |
|------------------------|-----------------------|--------------------------------------------|---------------------------------------------|-----------------------|-----------------------------------------------------------|
| <b>Before COVID-19</b> | <input type="radio"/> | <input type="radio"/>                      | <input type="radio"/>                       | <input type="radio"/> | <input type="radio"/>                                     |
| <b>After COVID-19</b>  | <input type="radio"/> | <input type="radio"/>                      | <input type="radio"/>                       | <input type="radio"/> | <input type="radio"/>                                     |

Please tell us about your family situation

63. What is the layout of your house? \*

*Mark only one oval.*

- ☐ 1R、 1K
- ☐ 2K、 2DK、 2LDK
- ☐ 3K、 3DK、 3LDK
- ☐ 4K、 4DK、 4LDK
- ☐ 5K、 5DK、 5LDK or more
- ☐ Don't know, don't want to answer

64. What is your annual household income (including taxes)? \*

*Mark only one oval.*

- ☐ No income
- ☐ ~ less than 2 million yen
- ☐ 2-4 million yen
- ☐ 4-6 million yen
- ☐ 6-8 million yen
- ☐ 8-10 million yen
- ☐ 10-12 million yen
- ☐ 12-15 million yen
- ☐ 15-20 million yen
- ☐ 20 million yen or more
- ☐ Don't know, don't want to answer



65. What was the last school from which you graduated?

*Mark only one oval.*

- ☐ Junior high school
- ☐ High school
- ☐ Vocational school
- ☐ College of technology
- ☐ Junior college
- ☐ Four-year university
- ☐ Graduate school (including 6-year univ)
- ☐ Other

66. If you answered "other" above, please specify

---

67. A second survey will be scheduled after self-restraint and other conditions have completely improved. If you are willing to cooperate, please enter any 8-digit number (half-width characters) below and enter the same number for the second survey.

---

68. Please feel free to add any comments or suggestions you may have below. This is the last question. Thank you very much for your cooperation in this long survey!

---

---

---

---

---

**Table S1. Detailed attributions of participants**

| Prefecture where the participants lived | Cat |       | Dog |       |
|-----------------------------------------|-----|-------|-----|-------|
|                                         | No. | %     | No. | %     |
| Hokkaido                                | 28  | 4.58  | 27  | 4.68  |
| Aomori                                  | 2   | 0.33  | 4   | 0.69  |
| Iwate                                   | 5   | 0.82  | 1   | 0.17  |
| Miyagi                                  | 12  | 1.96  | 7   | 1.21  |
| Akita                                   | 2   | 0.33  | 3   | 0.52  |
| Yamagata                                | 3   | 0.49  | 4   | 0.69  |
| Fukushima                               | 6   | 0.98  | 2   | 0.35  |
| Ibaragi                                 | 13  | 2.12  | 11  | 1.91  |
| Tochigi                                 | 3   | 0.49  | 11  | 1.91  |
| Gunma                                   | 2   | 0.33  | 3   | 0.52  |
| Saitama                                 | 42  | 6.86  | 36  | 6.24  |
| Chiba                                   | 35  | 5.72  | 31  | 5.37  |
| Tokyo                                   | 167 | 27.29 | 151 | 26.17 |
| Kanagawa                                | 78  | 12.75 | 67  | 11.61 |
| Niigata                                 | 6   | 0.98  | 6   | 1.04  |
| Toyama                                  | 1   | 0.16  | 2   | 0.35  |
| Ishikawa                                | 3   | 0.49  | 4   | 0.69  |
| Fukui                                   | 1   | 0.16  | 0   | 0     |
| Yamanashi                               | 5   | 0.82  | 1   | 0.17  |
| Nagano                                  | 7   | 1.14  | 2   | 0.35  |
| Gifu                                    | 4   | 0.65  | 8   | 1.39  |
| Shizuoka                                | 14  | 2.29  | 17  | 2.95  |
| Aichi                                   | 35  | 5.72  | 27  | 4.68  |
| Mie                                     | 4   | 0.65  | 6   | 1.04  |
| Shiga                                   | 3   | 0.49  | 4   | 0.69  |
| Kyoto                                   | 15  | 2.45  | 10  | 1.73  |
| Ohsaka                                  | 27  | 4.41  | 26  | 4.51  |
| Hyogo                                   | 17  | 2.78  | 23  | 3.99  |
| Nara                                    | 2   | 0.33  | 6   | 1.04  |
| Wakayama                                | 0   | 0     | 1   | 0.17  |
| Okayama                                 | 5   | 0.82  | 6   | 1.04  |
| Tottori                                 | 1   | 0.16  | 1   | 0.17  |
| Shimane                                 | 1   | 0.16  | 1   | 0.17  |

|           |     |      |     |      |
|-----------|-----|------|-----|------|
| Hiroshima | 8   | 1.31 | 11  | 1.91 |
| Yamaguchi | 4   | 0.65 | 2   | 0.35 |
| Tokushima | 2   | 0.33 | 0   | 0    |
| Kagawa    | 5   | 0.82 | 5   | 0.87 |
| Ehime     | 3   | 0.49 | 3   | 0.52 |
| Kochi     | 2   | 0.33 | 1   | 0.17 |
| Fukuoka   | 15  | 2.45 | 30  | 5.2  |
| Saga      | 3   | 0.49 | 0   | 0    |
| Nagasaki  | 1   | 0.16 | 4   | 0.69 |
| Kumamoto  | 5   | 0.82 | 3   | 0.52 |
| Ohita     | 5   | 0.82 | 3   | 0.52 |
| Miyazaki  | 3   | 0.49 | 2   | 0.35 |
| Kagoshima | 4   | 0.65 | 3   | 0.52 |
| Okinawa   | 3   | 0.49 | 1   | 0.17 |
| Total     | 612 | 100  | 577 | 100  |

#### Job style of participant

|           | No. | %     | No. | %     |
|-----------|-----|-------|-----|-------|
| Full time | 363 | 59.31 | 305 | 52.86 |
| Part time | 139 | 22.71 | 140 | 24.26 |
| Student   | 11  | 1.80  | 9   | 1.56  |
| No job    | 99  | 16.18 | 123 | 21.32 |
| Total     | 612 | 100   | 577 | 100   |

#### Educational background of participants

|                                         | No. | %     | No. | %     |
|-----------------------------------------|-----|-------|-----|-------|
| Graduate school (including 6-year univ) | 44  | 7.19  | 41  | 7.11  |
| Four-year university                    | 233 | 38.07 | 213 | 36.92 |
| Junior college                          | 97  | 15.85 | 109 | 18.89 |
| College of technology                   | 13  | 2.12  | 17  | 2.95  |
| Vocational school                       | 95  | 15.52 | 82  | 14.21 |
| High school                             | 117 | 19.12 | 103 | 17.85 |
| Junior high school                      | 8   | 1.31  | 3   | 0.52  |
| Others                                  | 3   | 0.49  | 3   | 0.52  |
| NA                                      | 2   | 0.33  | 6   | 1.04  |
| Total                                   | 612 | 100   | 577 | 100   |

**Household income/year**

|                           | <b>No.</b> | <b>%</b> | <b>No.</b> | <b>%</b> |
|---------------------------|------------|----------|------------|----------|
| 20 million yen or more    | 8          | 1.31     | 15         | 2.60     |
| 15-20 million yen         | 17         | 2.78     | 15         | 2.60     |
| 12-15 million yen         | 19         | 3.10     | 27         | 4.68     |
| 10-12 million yen         | 44         | 7.19     | 50         | 8.67     |
| 8-10 million yen          | 78         | 12.75    | 91         | 15.77    |
| 6-8 million yen           | 109        | 17.81    | 110        | 19.06    |
| 4-6 million yen           | 130        | 21.24    | 109        | 18.89    |
| 2-4 million yen           | 117        | 19.12    | 70         | 12.13    |
| ~ less than 2 million yen | 27         | 4.41     | 14         | 2.43     |
| No income                 | 2          | 0.33     | 2          | 0.35     |
| NA                        | 61         | 9.97     | 74         | 12.82    |
| Total                     | 612        | 100      | 577        | 100      |

**House layout**

|                      | <b>No.</b> | <b>%</b> | <b>No.</b> | <b>%</b> |
|----------------------|------------|----------|------------|----------|
| 5K、5DK、5LDK and more | 86         | 14.05    | 107        | 18.54    |
| 4K、4DK、4LDK          | 123        | 20.10    | 153        | 26.52    |
| 3K、3DK、3LDK          | 173        | 28.27    | 171        | 29.64    |
| 2K、2DK、2LDK          | 162        | 26.47    | 99         | 17.16    |
| 1R、1K                | 50         | 8.17     | 23         | 3.99     |
| NA                   | 18         | 2.94     | 24         | 4.16     |
| Total                | 612        | 100      | 577        | 100      |

**Table S2. Attributions of cohabitants**

|            | <b>Cat</b> |           | <b>Dog</b> |           |
|------------|------------|-----------|------------|-----------|
| <b>Age</b> | <i>M</i>   | <i>SD</i> | <i>M</i>   | <i>SD</i> |
|            | 46.92      | 21.67     | 46.92      | 21.67     |

| <b>Gender</b> | <b>No.</b> | <b>%</b> | <b>No.</b> | <b>%</b> |
|---------------|------------|----------|------------|----------|
| Female        | 279        | 37.45    | 272        | 33.79    |
| Male          | 463        | 62.15    | 522        | 64.84    |
| Other/NA      | 3          | 0.40     | 11         | 1.37     |
| Total         | 745        | 100      | 805        | 100      |

| <b>Relationship</b> | <b>No.</b> | <b>%</b> | <b>No.</b> | <b>%</b> |
|---------------------|------------|----------|------------|----------|
| Partner             | 308        | 41.40    | 364        | 45.16    |
| Parents             | 206        | 27.69    | 193        | 23.95    |
| Children            | 159        | 21.37    | 192        | 23.82    |
| Other relatives     | 65         | 8.74     | 54         | 6.70     |
| Friends             | 4          | 0.54     | 2          | 0.25     |
| Other               | 2          | 0.27     | 1          | 0.12     |
| Total               | 744        | 100      | 806        | 100      |

**Job sytle of cohabiting people**

|                             | <b>No.</b> | <b>%</b> | <b>No.</b> | <b>%</b> |
|-----------------------------|------------|----------|------------|----------|
| Full time job               | 393        | 53.04    | 428        | 53.30    |
| Part time job               | 71         | 9.58     | 60         | 7.47     |
| No job                      | 159        | 21.46    | 177        | 22.04    |
| Student                     | 95         | 12.82    | 123        | 15.32    |
| Kindergarten/Nursery school | 13         | 1.75     | 9          | 1.12     |
| Infant/children at home     | 10         | 1.35     | 6          | 0.75     |
| Total                       | 741        | 100      | 803        | 100      |

**Changes in their working and schooling conditions due to the COVID-19 pandemic**

|  | <b>No.</b> | <b>%</b> | <b>No.</b> | <b>%</b> |
|--|------------|----------|------------|----------|
|--|------------|----------|------------|----------|

|                    |     |       |     |       |
|--------------------|-----|-------|-----|-------|
| home / unchanged   | 189 | 26.00 | 220 | 27.64 |
| office / unchanged | 201 | 27.65 | 226 | 28.39 |
| home / changed     | 183 | 25.17 | 208 | 26.13 |
| office / changed   | 154 | 21.18 | 142 | 17.84 |
| Total              | 727 | 100   | 796 | 100   |

**Changes in their schooling conditions due to the COVID-19 pandemic of children (under 18)**

|                    | <b>No.</b> | <b>%</b> | <b>No.</b> | <b>%</b> |
|--------------------|------------|----------|------------|----------|
| home / unchanged   | 12         | 13.79    | 7          | 9.46     |
| office / unchanged | 18         | 20.69    | 3          | 4.05     |
| home / changed     | 53         | 60.92    | 56         | 75.68    |
| office / changed   | 4          | 4.60     | 6          | 8.11     |
| NA                 | 0          | 0.00     | 2          | 2.70     |
| Total              | 87         | 100      | 74         | 100      |

**Age of children (under 18)**

|  | <b><i>M</i></b> | <b><i>SD</i></b> | <b><i>M</i></b> | <b><i>SD</i></b> |
|--|-----------------|------------------|-----------------|------------------|
|  | 9.92            | 5.46             | 11.30           | 5.24             |

※Because of the missing values, the number of family members were different among tables.

**Table S3. Attributions of cats**

|                                         | <i>M</i> | <i>SD</i> | Effective data size |
|-----------------------------------------|----------|-----------|---------------------|
| Age in years                            | 7.04     | 4.91      | 582                 |
| Age in months at which breeding started | 4.45     | 8.44      | 511                 |
| Body weight (kg)                        | 4.63     | 1.33      | 596                 |

**Sex**

|          | No. | %     |
|----------|-----|-------|
| Male     | 325 | 53.10 |
| Female   | 287 | 46.90 |
| Other/NA | 0   | 0     |
| Total    | 612 | 100   |

**Neuterd**

|       | No. | %     |
|-------|-----|-------|
| Done  | 582 | 95.10 |
| No    | 29  | 4.74  |
| NA    | 1   | 0.16  |
| Total | 612 | 100   |

**Origin**

|          | No. | %     |
|----------|-----|-------|
| Pet shop | 70  | 11.44 |
| Breeder  | 29  | 4.74  |
| Shelter  | 158 | 25.82 |
| Other    | 328 | 53.59 |
| NA       | 27  | 4.41  |
| Total    | 612 | 100   |

**Breed**

|                    | No. | %     |
|--------------------|-----|-------|
| Mongrel            | 408 | 66.67 |
| Russian blue       | 18  | 2.94  |
| Scottish fold      | 18  | 2.94  |
| American shorthair | 23  | 3.76  |
| Norwegian          | 9   | 1.47  |
| Japanese           | 8   | 1.31  |

|                     |     |       |
|---------------------|-----|-------|
| British shorthair   | 6   | 0.98  |
| Maine coon          | 5   | 0.82  |
| Ragdoll             | 5   | 0.82  |
| American curl       | 4   | 0.65  |
| Munchkin            | 4   | 0.65  |
| Bengal              | 3   | 0.49  |
| Minuet              | 3   | 0.49  |
| Persian chinchilla  | 3   | 0.49  |
| Exotic shorthair    | 2   | 0.33  |
| Ragamuffin          | 2   | 0.33  |
| Siberian            | 2   | 0.33  |
| Singapura           | 2   | 0.33  |
| Chartreux           | 1   | 0.16  |
| Himalayan           | 1   | 0.16  |
| Laperm              | 1   | 0.16  |
| Oriental short hair | 1   | 0.16  |
| Somali              | 1   | 0.16  |
| Tonkinese           | 1   | 0.16  |
| NA                  | 81  | 13.24 |
| Total               | 612 | 100   |

### Coat color

|                       | No. | %     |
|-----------------------|-----|-------|
| Brown tabby           | 82  | 13.40 |
| Black and white       | 66  | 10.78 |
| Brown tabby and white | 60  | 9.80  |
| Black                 | 48  | 7.84  |
| Calico                | 41  | 6.70  |
| Red tabby             | 40  | 6.54  |
| Gray                  | 28  | 4.58  |
| White                 | 27  | 4.41  |
| Tortoiseshell         | 21  | 3.43  |
| Red and white         | 15  | 2.45  |
| Other and NA          | 184 | 30.07 |
| Total                 | 612 | 100   |

### Eye color



|              | <b>No.</b> | <b>%</b> |
|--------------|------------|----------|
| Green        | 205        | 33.50    |
| Yellow       | 161        | 26.31    |
| Gold         | 54         | 8.82     |
| Yellow green | 36         | 5.88     |
| Blue         | 29         | 4.74     |
| Other and NA | 127        | 20.75    |
| Total        | 612        | 100      |

#### **Hair length**

|        | <b>No.</b> | <b>%</b> |
|--------|------------|----------|
| Short  | 516        | 84.31    |
| Long   | 68         | 11.11    |
| Middle | 20         | 3.27     |
| NA     | 8          | 1.31     |
| Total  | 612        | 100      |

#### **Cohabiting animals other than cats**

|               | <b>No.</b> | <b>%</b> |
|---------------|------------|----------|
| Dog           | 50         | 8.17     |
| Dog and other | 8          | 1.31     |
| Other         | 134        | 21.90    |
| NA            | 420        | 68.63    |
| Total         | 612        | 100      |

**Table S4. Attributions of dogs**

|                                         | <i>M</i> | <i>SD</i> | Effective data size |
|-----------------------------------------|----------|-----------|---------------------|
| Age in years                            | 7.55     | 4.35      | 561                 |
| Age in months at which breeding started | 5.37     | 10.98     | 527                 |
| Body weight (kg)                        | 8.48     | 6.49      | 568                 |

**Sex**

|          | No. | %     |
|----------|-----|-------|
| Male     | 280 | 48.53 |
| Female   | 297 | 51.47 |
| Other/NA | 0   | 0     |
| Total    | 577 | 100   |

**Neuterd**

|       | No. | %     |
|-------|-----|-------|
| Done  | 467 | 80.94 |
| No    | 110 | 19.06 |
| NA    | 0   | 0.00  |
| Total | 577 | 100   |

**Origin**

|          | No. | %     |
|----------|-----|-------|
| Pet shop | 264 | 45.75 |
| Breeder  | 170 | 29.46 |
| Shelter  | 74  | 12.82 |
| Other    | 66  | 11.44 |
| NA       | 3   | 0.52  |
| Total    | 577 | 100   |

**Breed**

|                      | No. | %     |
|----------------------|-----|-------|
| Mongrel              | 94  | 16.29 |
| Shiba                | 80  | 13.86 |
| Jack russell terrier | 60  | 10.40 |
| Toy poodle           | 60  | 10.40 |
| Miniature dachshund  | 33  | 5.72  |
| Chihuahua            | 19  | 3.29  |

|                             |    |      |
|-----------------------------|----|------|
| Miniature schnauzer         | 19 | 3.29 |
| Papillon                    | 17 | 2.95 |
| Welsh corgi                 | 14 | 2.43 |
| French bulldog              | 13 | 2.25 |
| Pomeranian                  | 13 | 2.25 |
| Yorkshire errier            | 12 | 2.08 |
| Golden retriever            | 11 | 1.91 |
| Shih tzu                    | 10 | 1.73 |
| Maltese                     | 10 | 1.73 |
| Russian toy terrier         | 8  | 1.39 |
| beagle                      | 6  | 1.04 |
| Labrador retriever          | 6  | 1.04 |
| Long chihuahua              | 6  | 1.04 |
| Cavalier                    | 5  | 0.87 |
| Shetland sheepdog           | 5  | 0.87 |
| Pug                         | 5  | 0.87 |
| Border collie               | 5  | 0.87 |
| Wire fox terrier            | 5  | 0.87 |
| West highland white terrier | 4  | 0.69 |
| Miniature pinscher          | 4  | 0.69 |
| American cocker spaniel     | 3  | 0.52 |
| Italian greyhound           | 3  | 0.52 |
| Boston terrier              | 3  | 0.52 |
| German shepherd             | 2  | 0.35 |
| Brussels griffon            | 2  | 0.35 |
| Australian labradoodle      | 2  | 0.35 |
| Pekingese                   | 2  | 0.35 |
| English golden              | 1  | 0.17 |
| English bulldog             | 1  | 0.17 |
| Australian shepherd         | 1  | 0.17 |
| Kaninchen ducks             | 1  | 0.17 |
| Cairn terrier               | 1  | 0.17 |
| Samoyed                     | 1  | 0.17 |
| Siberian husky              | 1  | 0.17 |
| Schnauzer                   | 1  | 0.17 |
| Smooth fox terrier          | 1  | 0.17 |
| Chinese crested dog         | 1  | 0.17 |

|                        |     |      |
|------------------------|-----|------|
| Norfolk terrier        | 1   | 0.17 |
| Bernese mountain dog   | 1   | 0.17 |
| Basset hound           | 1   | 0.17 |
| Bichon frize           | 1   | 0.17 |
| Border terrier         | 1   | 0.17 |
| Pomeranian             | 1   | 0.17 |
| White shepherd         | 1   | 0.17 |
| Miniature bull terrier | 1   | 0.17 |
| Long coat chihuahua    | 1   | 0.17 |
| Weimaraner             | 1   | 0.17 |
| Wire ducks             | 1   | 0.17 |
| NA                     | 15  | 2.60 |
| Total                  | 577 | 100  |

#### **Cohabiting animals other than dogs**

|               | <b>No.</b> | <b>%</b> |
|---------------|------------|----------|
| Cat           | 24         | 4.16     |
| Cat and other | 1          | 0.17     |
| Other         | 17         | 2.95     |
| NA            | 535        | 92.72    |
| Total         | 577        | 100      |
